# Supplementary material
Source: ML conference proceedings conference paper supplement (https://openreview.net/forum?id=XRNN9i1xpi)
Supplement: supplementary_material [file attachment]

Firstly, several needed python packages are needed to be installed, such as torch, torch_geometric, tsl and networkx. Please also make the directory of provided codes as your main directory.

- For generating the results for **Stability Analysis**, please run “Stability_Analysis.py” in the “Stability_Analysis” folder.
- For generating the results for **Over-smoothing Analysis**, please run “OverSmoothing_Analysis.py” in the “Oversmoothing_Analysis” folder.
- For generating the results on **MetrLA dataset** with number of horizons x, please run “MetrLA_Hx.py” in the “MetrLA_PemsBay” folder.
- For generating the results on **PemsBay dataset** with number of horizons x, please run “PemsBay_Hx.py” in the “MetrLA_PemsBay” folder.
- For generating the results on **Molene dataset** with number of horizons x, please run “Molene_prediction.py” in the “Molene” folder.
- For generating the results on **NOAA dataset** with number of horizons x, please run “NOAA_prediction.py” in the “NOAA” folder.
